# Supplementary material for: Temporal flexibility of gene regulatory network underlies a novel wing pattern in flies
Source: PubMed Central journal article supplement — Proc Natl Acad Sci U S A. 2020 May 11;117(21):11589–96. doi: 10.1073/pnas.2002092117 (PMC7261121; doi:10.1073/pnas.2002092117), 2020-05-11
Supplement: pnas.2002092117.sapp.pdf [file pnas.2002092117.sapp.pdf]

## Supplementary Figure Legends

**Figure S1.** A close-up of fine wing pigmentation differences between *S. leonensis* and *S. ocellaris*. The pupal expression of Engrailed exactly prefigures the sites of future white spots in the adult wings. This correlation between the expression of Engrailed and the absence of black pigmentation reinforces the putative role of En in making the white spots on *Samoaia* species' wings.

**Figure S2.** *In situ* hybridization of *yellow* and *engrailed* in *S. leonensis*. (A) Spotted pharate wing and expression of the transcript *y* in late pupal wing. (B) Time course of *en* expression over pupal wing development.

**Figure S3.** Molecular interactions between proteins of the hedgehog loop in case of depletion and overexpression of engrailed in *D. melanogaster*. We followed the expression of the different players by immunostaining in the third instar larvae wing disc and the late pupal wing. Our results confirm the existence of an active hedgehog loop in the wing disc, and show for the first time that this loop becomes at least partially inactive during late pupal wing development.

**Figure S4.** Immunostainings of Dll in the Hawaiian drosophilids and the species *Chymomyza amoena*. The expression pattern of Dll (right panel) prefigures the black domains in the adult wing (left panel).

**Figure S5.** Time course experiments for additional genes. (A) Critical time points were identified for loss-of-function and gain-of-function contexts. The phenotypes range from severe A-P polarity defects to weak vein malformation for gain-of-function (B) and loss-of-function (C) contexts.

**Figure S6.** Overview of time course experiments. Loss-of-function experiments for the whole set of genes investigated define a time window (black domain) during which genes cannot be recruited for a novel function. Gain-of-function experiments define a time window (dark grey domain) during which co-option is possible, but unlikely in regard to morphological alteration of the wing such recruitment might create. Gene co-option is more likely to occur beyond the dark grey domain (see pale grey domain).

**Table S1.** List of primers used in this study.

**Table S2.** Gene accession numbers.

A

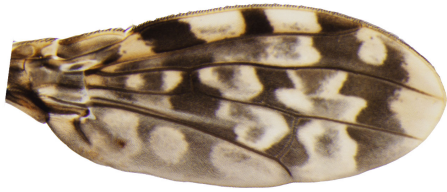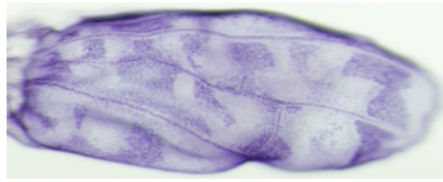

yellow

B

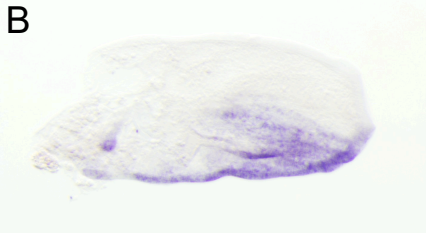

C

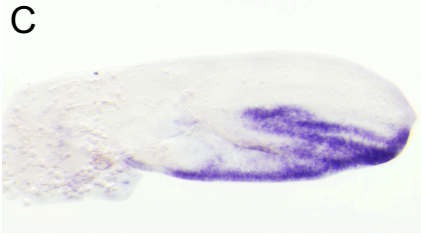

D

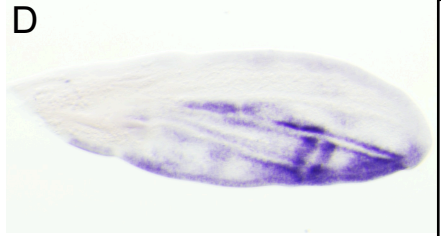

E

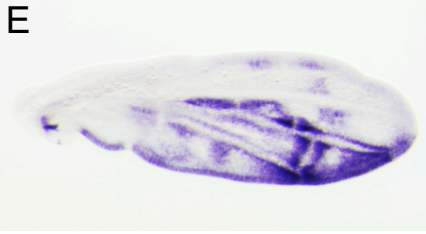

F

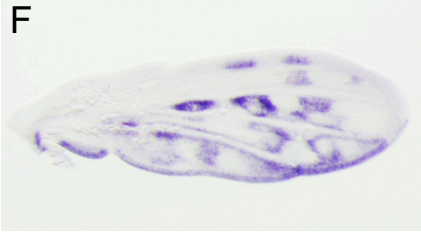

G

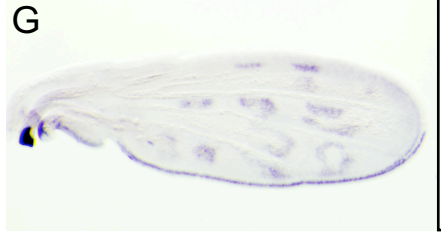

engrailed

*S. leonensis*

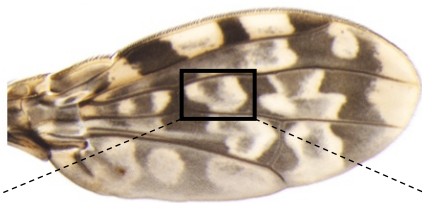

*S. ocellaris*

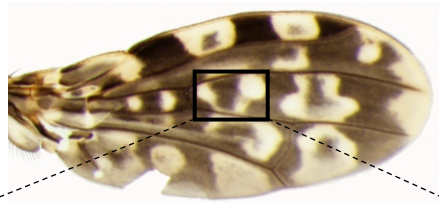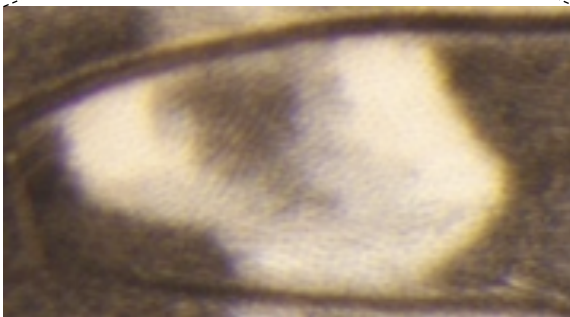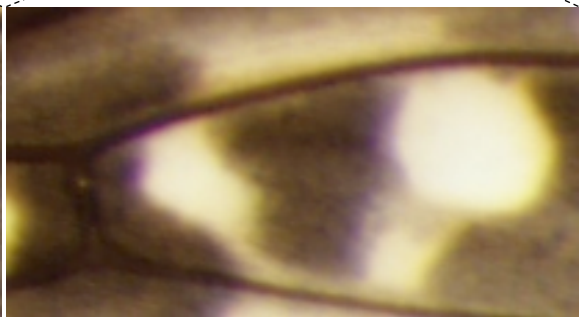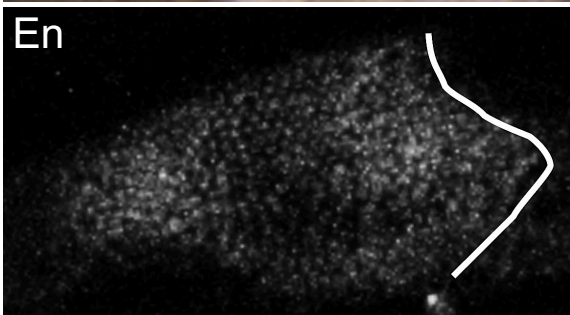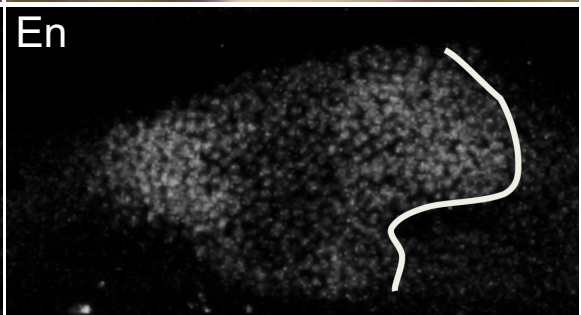

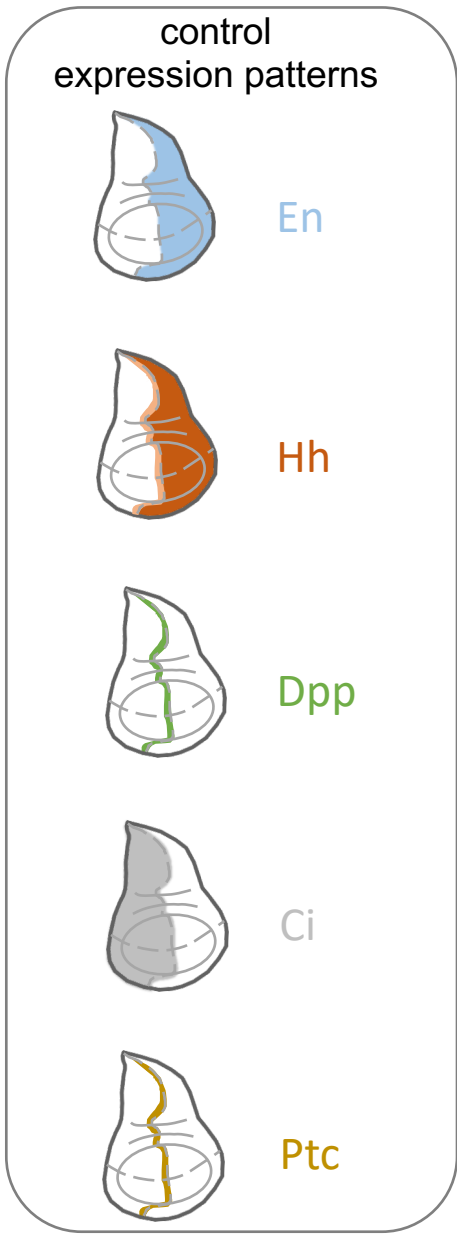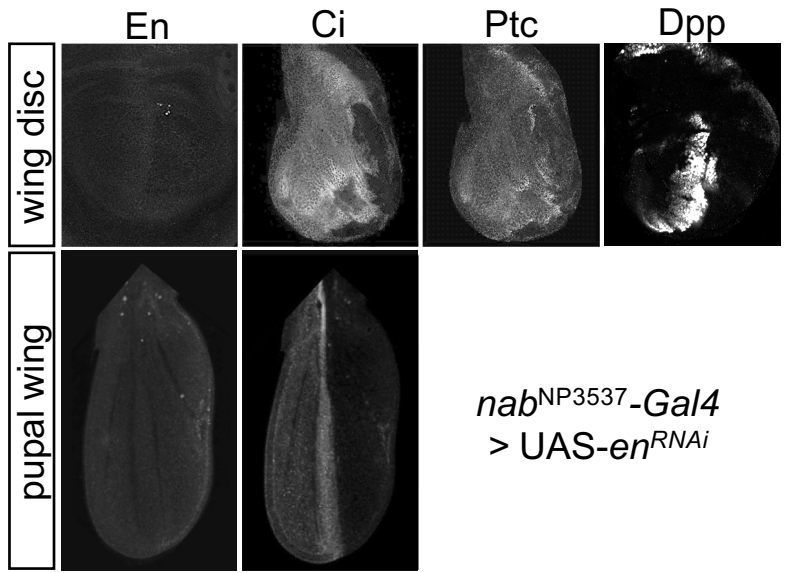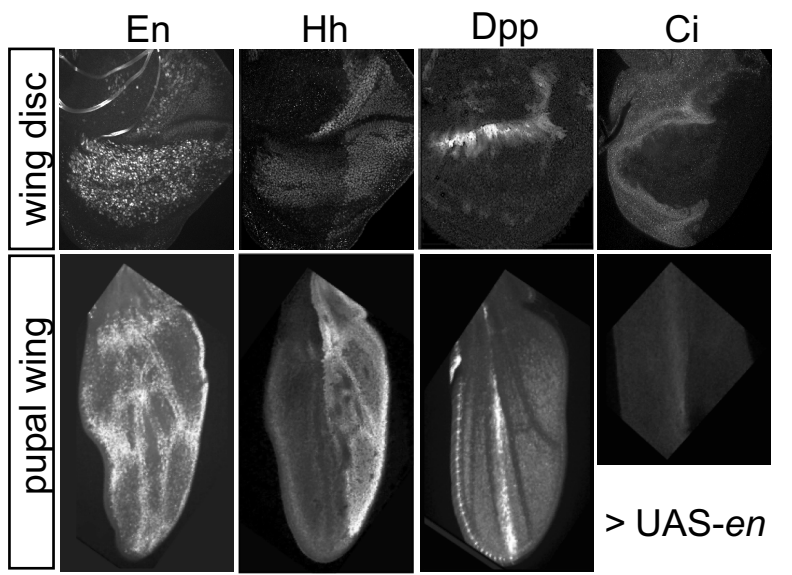

*C. amoena*

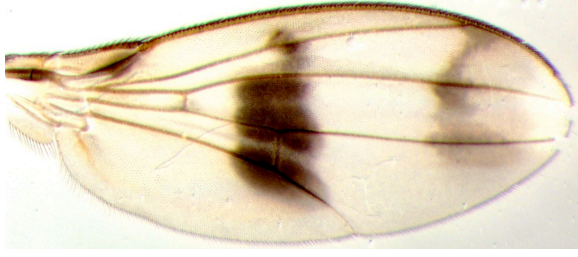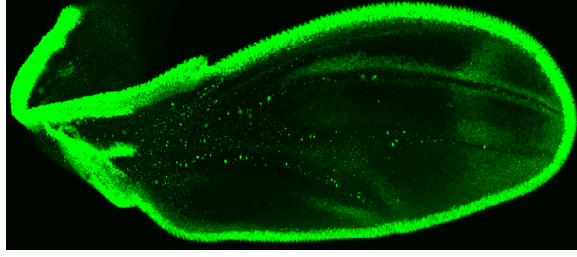

*D. hawaiiensis*

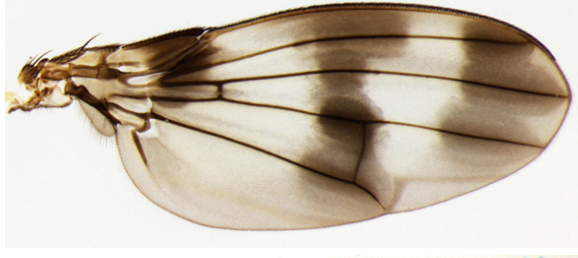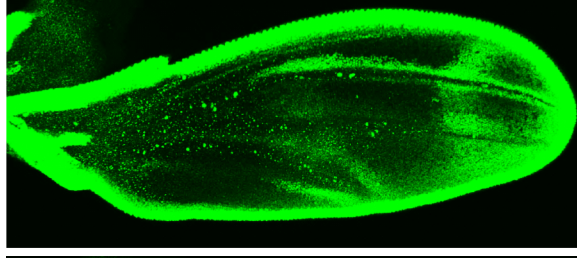

*D. silvestris*

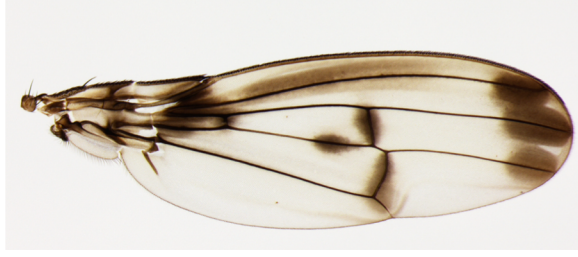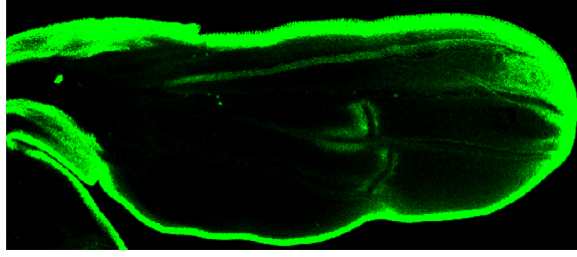

*D. grimshawi*

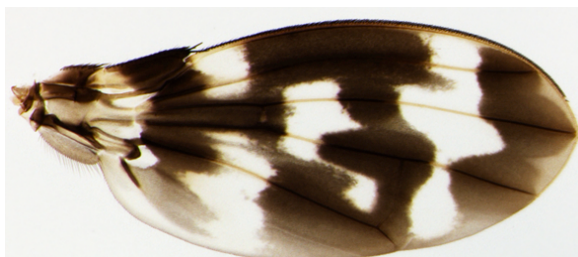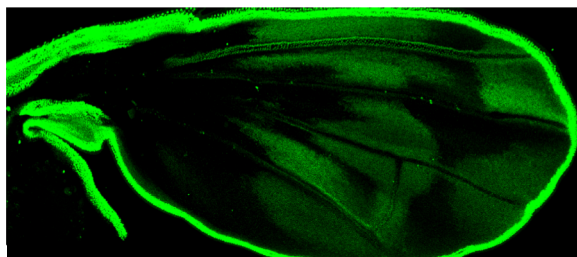

A

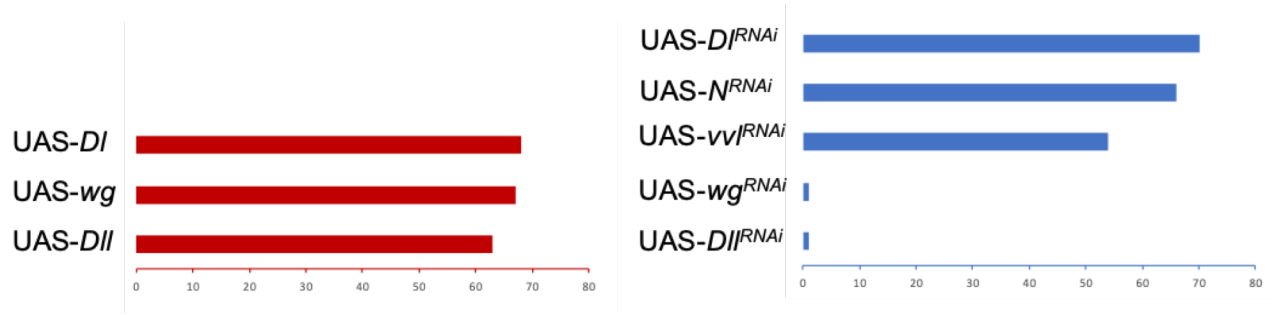

B

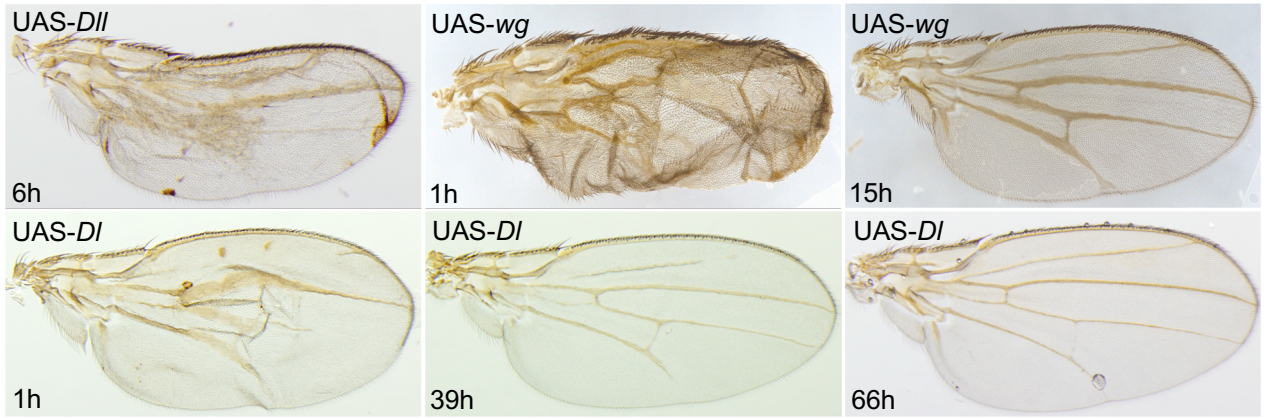

C

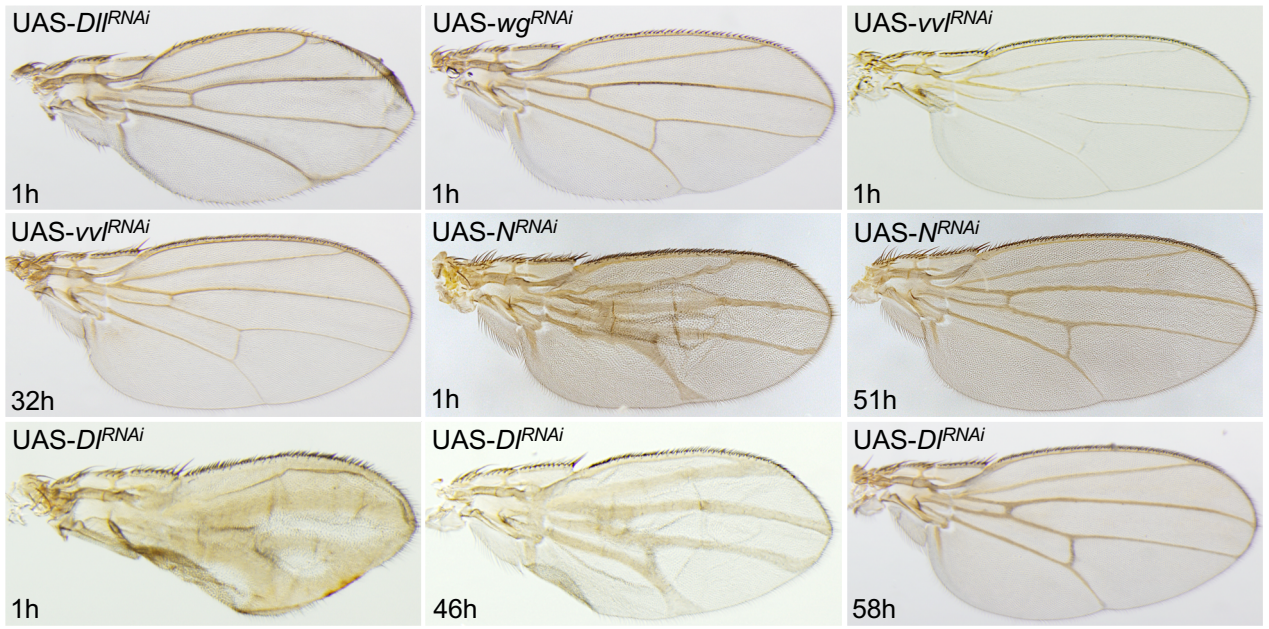

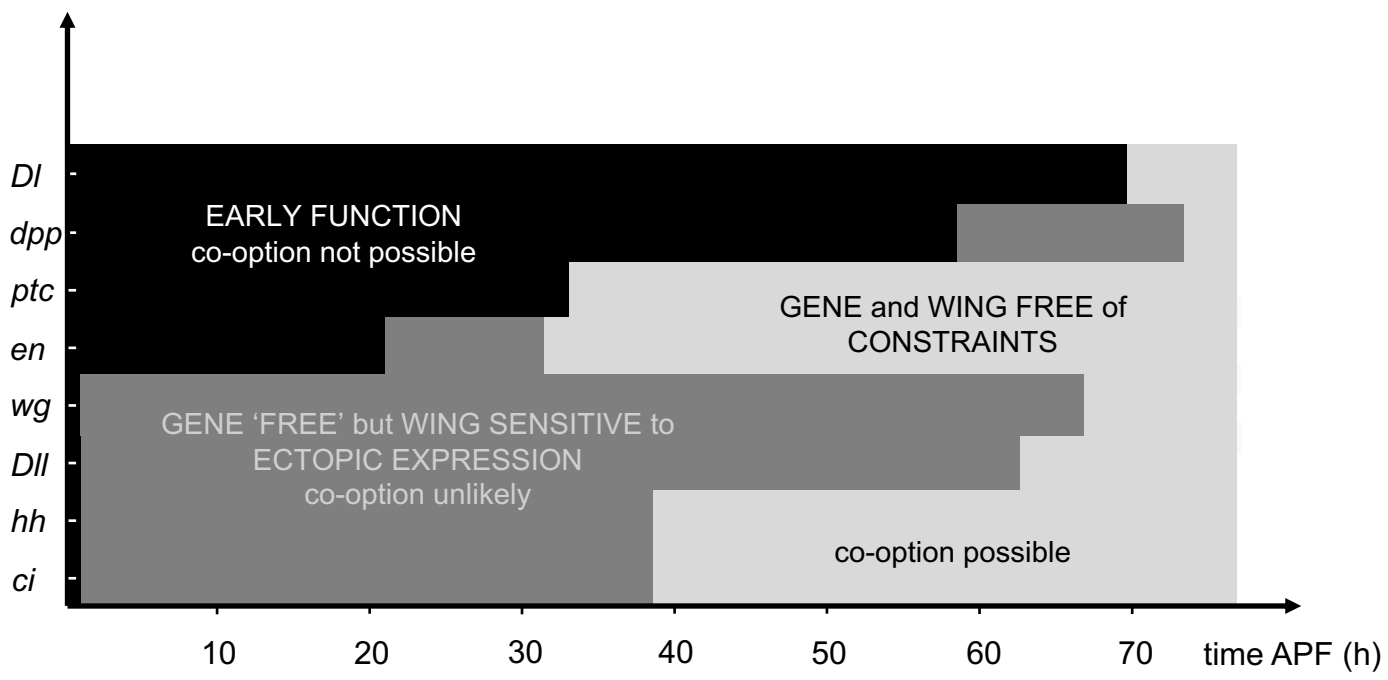

| Gene                | Primer name     | Sequence 5'-3'                                       | References               |
|---------------------|-----------------|------------------------------------------------------|--------------------------|
| Amyrel              | zone2bis        | GTAAATNGGNCCACGCGAAG                                 | Da Lage et al.<br>(2007) |
|                     | relrev+         | GTTCCCCAGCTCTGCAGCC                                  |                          |
|                     | reludir         | TGGATGCNGCCAAGCACATGGC                               |                          |
| cubitus interruptus | relavbis        | GCATTTGTACCGTTTGTGTCGTTATCG                          | Holland et al.<br>(1991) |
|                     | deg-ci -Fwd     | GAGAGGATCCNTTYAARGCNCARTAYATG                        |                          |
| decapentaplegic     | deg-ci -Rev     | GAGAAGCTTRTGACNGTYTTNACRTGYTT                        | this study               |
|                     | deg-dpp -Fwd    | CTGAAHAGCACIGAIACGGTSAG                              |                          |
| Delta               | deg-dpp -Rev    | GTMCTTTGGTCRTTGAGRTASAGCAT                           | this study               |
|                     | deg-Dl -Fwd     | SCKBGCCTCSGCRTCGTCCTT                                |                          |
| Distal-less         | deg-Dl -Rev     | TGYCAYAAAYGGMGGMACCTGCATGAA                          | this study               |
|                     | deg-Dll -Fwd    | TGATACCAATACTGSGGCACATA                              |                          |
| Dopa decarboxylase  | deg-Dll -Rev    | ATGATGAARGCMGCTCAGGG                                 | this study               |
|                     | deg-Ddc -Fwd    | TTCCASGAGTACTCCATGTCCTCG                             |                          |
| ebony               | deg-Ddc -Rev    | GGCAGGATGKATGAAGGACATTGAG                            | this study               |
|                     | deg-e -Fwd      | CCCATSACCTCKGTGGAGCCGTA                              |                          |
| engrailed           | deg-e -Rev      | CTGCATCGCATCTTYGAGGAGCA                              | this study               |
|                     | deg-en -Fwd     | GRTCGCTGTASCGSGTGACAGTA                              |                          |
| even skipped        | deg-en -Rev     | AATCAGCGCCAGTCCACCAG                                 | this study               |
|                     | deg-eve -Fwd    | TGCCTVTCCAGTCCRGAYAACTC                              |                          |
|                     | deg-eve -Rev    | TACGCCTCAGTCTTGATAGGG                                |                          |
|                     | deg-hh -Fwd     | ACCTTGABARGGCATTGGCATACCA                            |                          |
| hedgehog            | deg-hh -Rev     | ATCGGWGATCGDGTGCTRAGCATG                             | this study               |
|                     | Dme-hh -Fwd     | TGCTTCACGCCGAAAGCACA                                 |                          |
|                     | Dme-hh -Rev-T7  | <b>TAATACGACTCACTATAGG</b> ACCACAATGGTGCCCTCGCGGGTCA |                          |
|                     | Sle-hh -Fwd     | TCATGCCGGAGAGCACCCGCGC                               |                          |
| Notch               | Sle-hh -Rev-T7  | <b>TAATACGACTCACTATAGG</b> AGTTGACTACAATGGTCCCCTCT   | this study               |
|                     | deg-N -Fwd      | CATCCVTGCCAGAAYGAGGG                                 |                          |
| Notum               | deg-N -Rev      | GIGGRCAITCGCAYTTGTAGCC                               | this study               |
|                     | deg-Notum -Fwd  | TGGAAYATHCAYGADATGGGCGG                              |                          |
|                     | deg-Notum -Rev  | GAGCAGYTCVAGRAADCATCTC                               |                          |
|                     | deg-ptc -Fwd1   | ACCCAGCTGCGCATSAGRAAGG                               |                          |
| patched             | deg-ptc -Rev1   | GCTGACGGCSGCSTATGCGG                                 | this study               |
|                     | deg-ptc -Fwd2   | ACCCAGCTGCGCATSAGRAACG                               |                          |
|                     | Dme-ptc -Fwd    | AGCACCCAGGTGGTTCCGTTTTTG                             |                          |
|                     | Dme-ptc -Rev-T7 | <b>TAATACGACTCACTATAGG</b> CTGTTGTTGTTGCAGCTCTTCGGAT |                          |
| tantalus            | Sle-ptc -Fwd    | GTATGCCGGAGAGCAGTCGCAAGGA                            | this study               |
|                     | deg-tant -Fwd   | TCRCAGCWAAGCCGMGGCGA                                 |                          |
|                     | deg-tant -Rev   | TGAGGCCATCRTTRAAGGARATGGC                            |                          |
| wingless            | deg-wg -Fwd     | AGCACGYCARGCRGAGATGCG                                | this study               |
|                     | deg-wg -Rev     | TTACCTRTTRTYTTGCGHCCC                                |                          |
| yellow              | deg-y -Fwd      | TATCCGGAYTGCGMAGCAATACGG                             | this study               |
|                     | deg-y -Rev      | GTCGCGATCSACAATGCCATGGAA                             |                          |



| gene                            | species                         | accession                |          |
|---------------------------------|---------------------------------|--------------------------|----------|
| Amyrel                          | <i>Drosophila deflecta</i>      | LS992514                 |          |
|                                 | <i>Drosophila guttifer</i>      | LS992515                 |          |
|                                 | <i>Drosophila deflecta</i>      | LS992508                 |          |
|                                 | <i>Drosophila funebris</i>      | LS992505                 |          |
|                                 | <i>Drosophila guttifer</i>      | LS992504                 |          |
| Distal-less                     | <i>Drosophila quadrilineata</i> | LS992507                 |          |
|                                 | <i>Samoaia attenuata</i>        | LS992664                 |          |
|                                 | <i>Samoaia hirta</i>            | LS992666                 |          |
|                                 | <i>Samoaia leonensis</i>        | LS992506                 |          |
|                                 | <i>Samoaia ocellaris</i>        | LS992665                 |          |
|                                 | <i>Drosophila deflecta</i>      | LS992509                 |          |
|                                 | <i>Drosophila guttifer</i>      | LS992513                 |          |
|                                 | <i>Drosophila quadrilineata</i> | LS992512                 |          |
|                                 | Dopa decarboxylase              | <i>Samoaia attenuata</i> | LS992668 |
|                                 |                                 | <i>Samoaia hirta</i>     | LS992669 |
| <i>Samoaia leonensis</i>        |                                 | LS992510                 |          |
| <i>Samoaia ocellaris</i>        |                                 | LS992667                 |          |
| <i>Zaprionus ghesquierei</i>    |                                 | LS992511                 |          |
| <i>Drosophila deflecta</i>      |                                 | LS992462                 |          |
| <i>Drosophila funebris</i>      |                                 | LS992463                 |          |
| <i>Drosophila guttifer</i>      |                                 | LS992464                 |          |
| <i>Drosophila quadrilineata</i> |                                 | LS992465                 |          |
| ebony                           |                                 | <i>Samoaia attenuata</i> | LS992671 |
|                                 | <i>Samoaia hirta</i>            | LS992672                 |          |
|                                 | <i>Samoaia leonensis</i>        | LS992466                 |          |
|                                 | <i>Samoaia ocellaris</i>        | LS992670                 |          |
|                                 | <i>Zaprionus ghesquierei</i>    | LS992467                 |          |
|                                 | <i>Drosophila deflecta</i>      | LS992516                 |          |
|                                 | <i>Drosophila funebris</i>      | LS992519                 |          |
|                                 | <i>Drosophila guttifer</i>      | LS992517                 |          |
| engrailed                       | <i>Drosophila quadrilineata</i> | LS992520                 |          |
|                                 | <i>Samoaia attenuata</i>        | LS992674                 |          |
|                                 | <i>Samoaia hirta</i>            | LS992675                 |          |
|                                 | <i>Samoaia leonensis</i>        | LS992518                 |          |
|                                 | <i>Samoaia ocellaris</i>        | LS992673                 |          |
|                                 | <i>Drosophila deflecta</i>      | LS992280                 |          |
|                                 | <i>Drosophila funebris</i>      | LS992281                 |          |
|                                 | <i>Drosophila guttifer</i>      | LS992282                 |          |
| even skipped                    | <i>Drosophila quadrilineata</i> | LS992283                 |          |
|                                 | <i>Samoaia attenuata</i>        | LS992677                 |          |
|                                 | <i>Samoaia hirta</i>            | LS992678                 |          |
|                                 | <i>Samoaia leonensis</i>        | LS992284                 |          |
|                                 | <i>Samoaia ocellaris</i>        | LS992676                 |          |
|                                 | <i>Zaprionus ghesquierei</i>    | LS992285                 |          |
|                                 | <i>Drosophila deflecta</i>      | LS992521                 |          |

|          |                                 |          |
|----------|---------------------------------|----------|
|          | <i>Drosophila funebris</i>      | LS992522 |
|          | <i>Drosophila guttifer</i>      | LS992526 |
|          | <i>Drosophila quadrilineata</i> | LS992523 |
| hedgehog | <i>Samoaia attenuata</i>        | LS997505 |
|          | <i>Samoaia hirta</i>            | LS997506 |
|          | <i>Samoaia leonensis</i>        | LS992525 |
|          | <i>Samoaia ocellaris</i>        | LS997504 |
|          | <i>Zaprionus ghesquierei</i>    | LS992524 |
|          | <i>Drosophila deflecta</i>      | LS992527 |
|          | <i>Drosophila guttifer</i>      | LS992528 |
| Notum    | <i>Samoaia attenuata</i>        | LS997502 |
|          | <i>Samoaia hirta</i>            | LS997503 |
|          | <i>Samoaia leonensis</i>        | LS992529 |
|          | <i>Samoaia ocellaris</i>        | LS997501 |
|          | <i>Drosophila deflecta</i>      | LS992530 |
|          | <i>Drosophila funebris</i>      | LS992534 |
|          | <i>Drosophila guttifer</i>      | LS992531 |
|          | <i>Drosophila quadrilineata</i> | LS992535 |
| patched  | <i>Samoaia attenuata</i>        | LS997499 |
|          | <i>Samoaia hirta</i>            | LS997500 |
|          | <i>Samoaia leonensis</i>        | LS992532 |
|          | <i>Samoaia ocellaris</i>        | LS997498 |
|          | <i>Zaprionus ghesquierei</i>    | LS992533 |
|          | <i>Drosophila deflecta</i>      | LS992536 |
|          | <i>Drosophila funebris</i>      | LS992540 |
|          | <i>Drosophila guttifer</i>      | LS992537 |
|          | <i>Drosophila quadrilineata</i> | LS992541 |
| tantalus | <i>Samoaia attenuata</i>        | LS997493 |
|          | <i>Samoaia hirta</i>            | LS997494 |
|          | <i>Samoaia leonensis</i>        | LS992538 |
|          | <i>Samoaia ocellaris</i>        | LS997492 |
|          | <i>Zaprionus ghesquierei</i>    | LS992539 |
|          | <i>Drosophila deflecta</i>      | LS992558 |
|          | <i>Drosophila funebris</i>      | LS992560 |
|          | <i>Drosophila guttifer</i>      | LS992562 |
|          | <i>Drosophila quadrilineata</i> | LS992561 |
| yellow   | <i>Samoaia attenuata</i>        | LS997496 |
|          | <i>Samoaia hirta</i>            | LS997497 |
|          | <i>Samoaia leonensis</i>        | LS992559 |
|          | <i>Samoaia ocellaris</i>        | LS997495 |
